# Supplementary material
Source: publisher figshare collection journal article supplement (https://karger.figshare.com/ndownloader/files/23234762)
Supplement: Supplementary file 1 [file 23234762]

## Table S2: Correlation of supraclavicular and gluteal PDFF with age, BMI and sex. BMI: body mass index, PDFF: proton density fat fraction, n.s.: non-significant

|  |  | Age | BMI | Sex |
| --- | --- | --- | --- | --- |
| PDFF gluteal | rho p | 0.22 0.03 | 0.5 <0.01 | 0.14 0.17 (n.s.) |
| PDFF supraclavicular | rho  p | 0.54 <0.01 | 0.64 <0.01 | -0.02 0.82 (n.s.) |
